# Supplementary material
Source: PubMed Central journal article supplement (PMC7216507)

Supplemental figures  
Kesari et al.

# Supplemental Figure 1

A

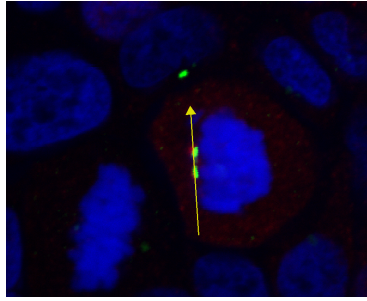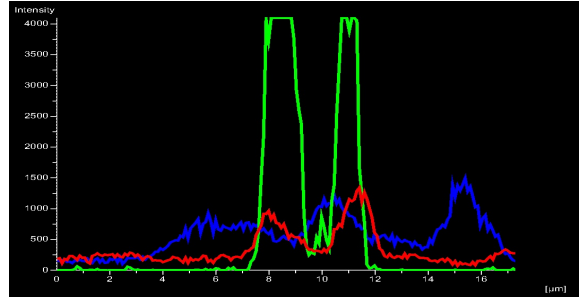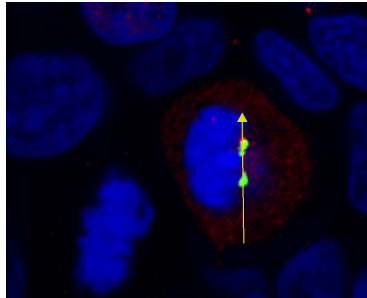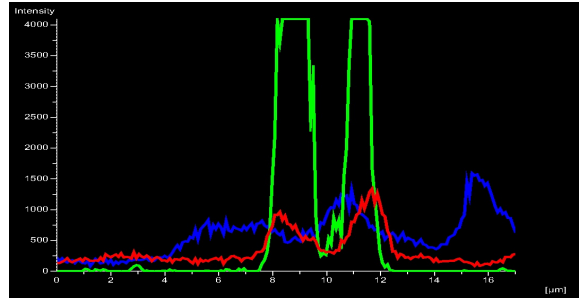

B

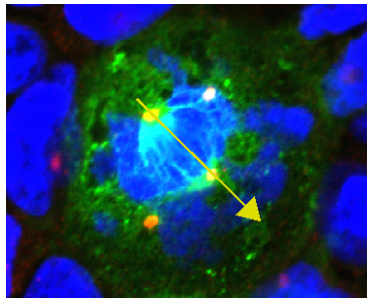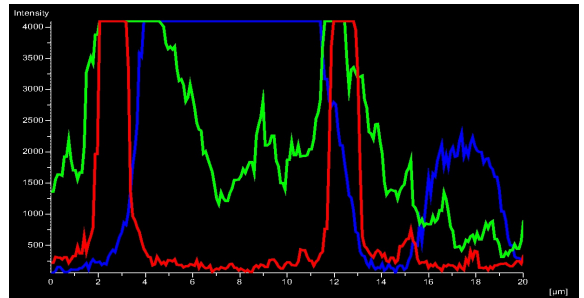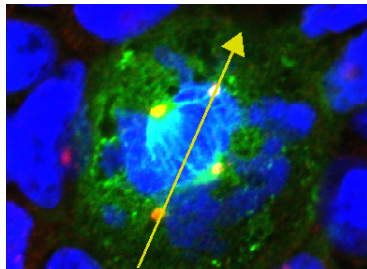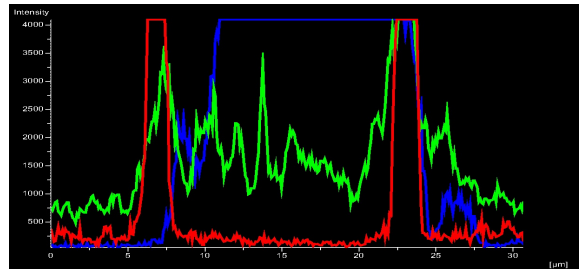

Supplemental Figure 2

A

nls-GFP # 1

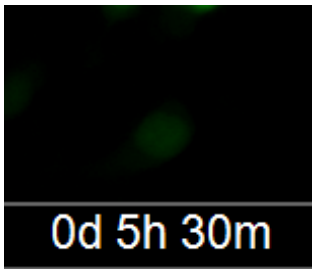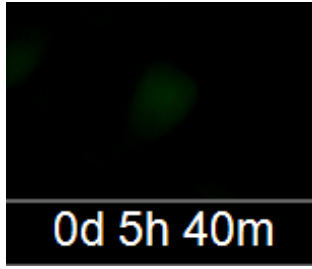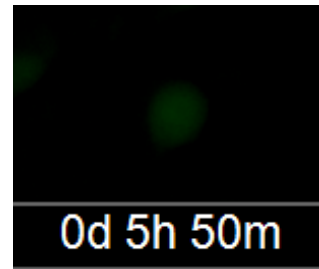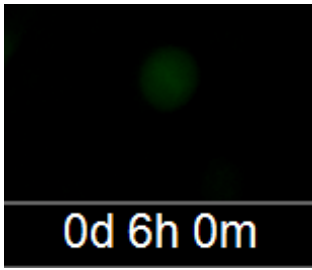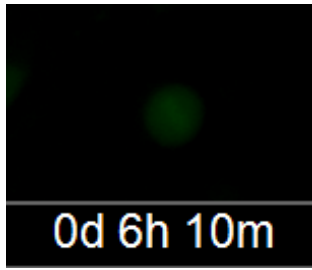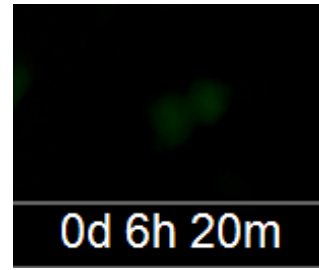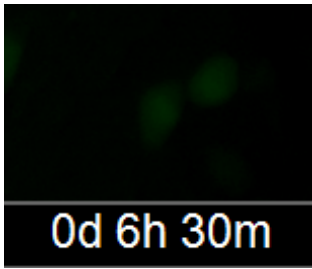

B

nls-GFP # 2

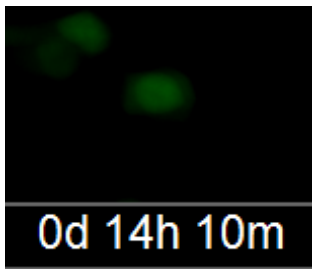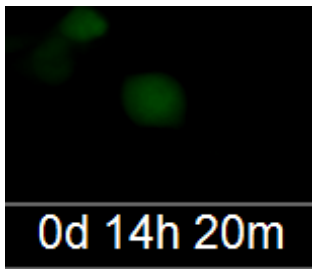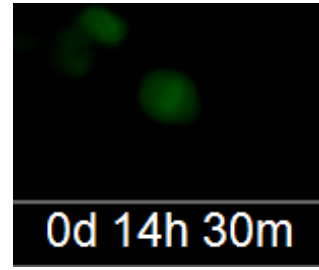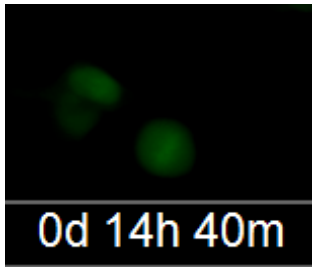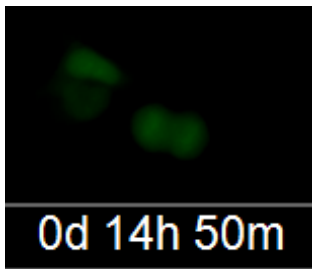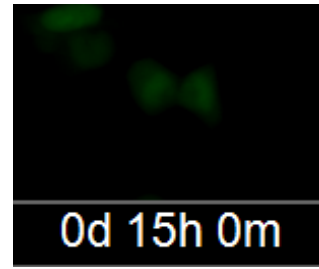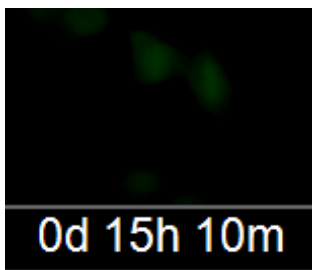

Supplement: NIHMS1546726-supplement-1.pdf [file NIHMS1546726-supplement-1.pdf]
